# Supplementary material for: High‐Intensity Versus Non‐High‐Intensity Statins in Patients Achieving Low‐Density Lipoprotein Cholesterol Goal After Percutaneous Coronary Intervention
Source: PubMed Central journal article supplement — J Am Heart Assoc. 2018 Oct 31;7(21):e009517. doi: 10.1161/JAHA.118.009517 (PMC6404203; doi:10.1161/jaha.118.009517), 2018-10-31
Supplement: JAH3-7-e009517-s001.pdf [file JAH3-7-e009517-s001.pdf]

# **SUPPLEMENTAL MATERIAL**

**Table S1. Statins used in the non-high-intensity statin group.**

|                             | <b>All patients who reviewed<br/>(n=4135)</b> | <b>Patients who achieved<br/>LDL-C target<br/>(n=1746)</b> |
|-----------------------------|-----------------------------------------------|------------------------------------------------------------|
| Non-high-intensity statins* | (n=3517)                                      | (n=1374)                                                   |
| Moderate-intensity statins  | 3377 (96.0)                                   | 1359 (98.9)                                                |
| Atorvastatin 10mg           | 1480 (42.1)                                   | 562 (40.9)                                                 |
| Rosuvastatin 10mg           | 754 (21.4)                                    | 386 (28.1)                                                 |
| Atorvastatin 20mg           | 446 (12.7)                                    | 219 (15.9)                                                 |
| Simvastatin 20mg            | 386 (11.0)                                    | 91 (6.6)                                                   |
| Pitavastatin 2mg            | 109 (3.1)                                     | 36 (2.6)                                                   |
| Fluvastatin XL 80mg         | 90 (2.6)                                      | 33 (2.4)                                                   |
| Simvastatin 40mg            | 63 (1.8)                                      | 19 (1.4)                                                   |
| Pravastatin 40mg            | 49 (1.4)                                      | 13 (0.9)                                                   |
| Low-intensity statins       | 140 (4.0)                                     | 15 (1.1)                                                   |
| Pravastatin 10mg            | 120 (3.4)                                     | 12 (0.9)                                                   |
| Lovastatin 20mg             | 13 (0.4)                                      | 3 (0.2)                                                    |
| Pravastatin 20mg            | 7 (0.2)                                       | -                                                          |

Values are n (%).

\* Definition of statin intensity was based on the guideline from 2013 ACC/AHA guideline on the treatment of blood cholesterol.

LDL-C = low-density lipoprotein cholesterol

**Table S2. The number of patients under follow-up and without statin information.**

| Year of follow-up* |                                             | Total population              |                                    | Propensity-matched population |                                   |
|--------------------|---------------------------------------------|-------------------------------|------------------------------------|-------------------------------|-----------------------------------|
|                    |                                             | High-intensity statin (n=372) | Non-high-intensity statin (n=1374) | High-intensity statin (n=367) | Non-high-intensity statin (n=798) |
| 1 year             | Patients under follow-up                    | 343                           | 1331                               | 338                           | 765                               |
|                    | Lack in information on statin type and dose | 40                            | 198                                | 40                            | 116                               |
|                    | Denominator in Table 3                      | 303                           | 1133                               | 298                           | 649                               |
| 2 years            | Patients under follow-up                    | 241                           | 1140                               | 237                           | 626                               |
|                    | Lack in information on statin type and dose | 47                            | 264                                | 47                            | 140                               |
|                    | Denominator in Table 3                      | 194                           | 876                                | 190                           | 486                               |
| 3 years            | Patients under follow-up                    | 189                           | 961                                | 186                           | 495                               |
|                    | Lack in information on statin type and dose | 47                            | 307                                | 47                            | 162                               |
|                    | Denominator in Table 3                      | 142                           | 654                                | 139                           | 333                               |

\*The denominators of Table 3 were calculated by subtracting the number of patients without statin information from the patients under follow-up at each year.
